# Supplementary material
Source: PubMed Central journal article supplement (PMC6224160)
Supplement: NIHMS988764-supplement-Supplemental_information.pdf [file NIHMS988764-supplement-Supplemental_information.pdf]

## SUPPORTING INFORMATION FOR ROSE ET AL.

**Supplemental Figure S1.** Scattergram of pure tone averages (0.5, 1, 2 and 3 kHz) and word recognition scores for 90 of 209 ears with sufficient data for inclusion in these plots. Each number in the individual squares represents the number of ears whose audiometric data puts them in a certain square. Dependent upon ability, word recognition scores were obtained using a variety of measures ranging from recorded NU6 words to live voice picture identification tests. Data shown were obtained from persons with zero, one or two mutant alleles of *SLC26A4*.

**Supplemental Figure S2.** Scattergram of pure tone averages (0.5, 1, 2 and 3 kHz) and word recognition scores for 64 ears with EVA in persons with zero mutant alleles of *SLC26A4*. Each number in the individual squares represents the number of ears whose audiometric data puts them in a certain square. Dependent upon ability, word recognition scores were obtained using a variety of measures ranging from recorded NU6 words to live voice picture identification tests.

**Supplemental Figure S3.** Scattergram of pure tone averages (0.5, 1, 2 and 3 kHz) and word recognition scores for 16 ears with EVA in persons with one mutant allele of *SLC26A4*. Each number in the individual squares represents the number of ears whose audiometric data puts them in a certain square. Dependent upon ability, word recognition scores were obtained using a variety of measures ranging from recorded NU6 words to live voice picture identification tests.

**Supplemental Figure S4.** Scattergram of pure tone averages (0.5, 1, 2 and 3 kHz) and word recognition scores for 10 ears with EVA in persons with two mutant alleles of *SLC26A4*. Each number in the individual squares represents the number of ears whose audiometric data puts them in a certain square. Dependent upon ability, word recognition scores were obtained using a variety of measures ranging from recorded NU6 words to live voice picture identification tests.

### Word Recognition Score (%)

100-90   89-80   79-70   69-60   59-50   49-40   39-30   29-20   19-10   9-0

Pure Tone Average (dB HL)

|        |           |          |          |          |          |          |          |          |          |          |
|--------|-----------|----------|----------|----------|----------|----------|----------|----------|----------|----------|
| 0-10   | <b>3</b>  |          |          |          |          |          |          |          |          |          |
| 11-20  | <b>3</b>  |          |          |          |          |          |          |          |          |          |
| 21-30  | <b>13</b> | <b>2</b> |          |          |          |          |          |          |          |          |
| 31-40  | <b>9</b>  | <b>1</b> |          |          |          |          |          |          |          |          |
| 41-50  | <b>8</b>  |          | <b>1</b> | <b>1</b> |          |          |          |          |          |          |
| 51-60  | <b>7</b>  | <b>2</b> | <b>2</b> |          | <b>1</b> | <b>1</b> |          |          |          |          |
| 61-70  | <b>5</b>  | <b>4</b> | <b>2</b> | <b>1</b> | <b>1</b> |          | <b>1</b> |          |          |          |
| 71-80  | <b>1</b>  | <b>1</b> | <b>1</b> |          | <b>1</b> |          | <b>2</b> |          | <b>1</b> |          |
| 81-90  |           |          | <b>2</b> |          | <b>2</b> | <b>2</b> | <b>1</b> |          | <b>3</b> |          |
| 91-100 |           |          |          |          |          |          |          | <b>1</b> | <b>1</b> | <b>2</b> |

# Word Recognition Score (%)

100-90 89-80 79-70 69-60 59-50 49-40 39-30 29-20 19-10 9-0

Pure Tone Average (dB HL)

|        |   |   |   |  |   |   |   |   |   |
|--------|---|---|---|--|---|---|---|---|---|
| 0-10   | 1 |   |   |  |   |   |   |   |   |
| 11-20  | 2 |   |   |  |   |   |   |   |   |
| 21-30  | 9 | 2 |   |  |   |   |   |   |   |
| 31-40  | 8 | 1 |   |  |   |   |   |   |   |
| 41-50  | 7 |   |   |  |   |   |   |   |   |
| 51-60  | 5 | 1 | 2 |  | 1 | 1 |   |   |   |
| 61-70  | 3 | 3 | 2 |  | 1 |   | 1 |   |   |
| 71-80  | 1 |   | 1 |  | 1 |   | 2 | 1 | 1 |
| 81-90  |   |   |   |  | 1 | 2 | 1 |   | 2 |
| 91-100 |   |   |   |  |   |   | 1 |   |   |



# Word Recognition Score (%)

100-90 89-80 79-70 69-60 59-50 49-40 39-30 29-20 19-10 9-0

Pure Tone Average (dB HL)

|        |          |          |          |  |          |  |  |          |          |
|--------|----------|----------|----------|--|----------|--|--|----------|----------|
| 0-10   | <b>1</b> |          |          |  |          |  |  |          |          |
| 11-20  |          |          |          |  |          |  |  |          |          |
| 21-30  | <b>1</b> |          |          |  |          |  |  |          |          |
| 31-40  |          |          |          |  |          |  |  |          |          |
| 41-50  |          |          |          |  |          |  |  |          |          |
| 51-60  |          |          |          |  |          |  |  |          |          |
| 61-70  | <b>1</b> |          |          |  |          |  |  |          |          |
| 71-80  |          | <b>1</b> |          |  |          |  |  |          |          |
| 81-90  |          |          | <b>2</b> |  | <b>1</b> |  |  |          |          |
| 91-100 |          |          |          |  |          |  |  | <b>1</b> | <b>2</b> |
